# Supplementary material for: Modeling Carbon Balance and Sugar Content of Vitis vinifera under Two Different Trellis Systems
Source: MDPI journal article supplement (doi:10.3390/plants10081675), 2021-08-15
Supplement: s1 [file s1]

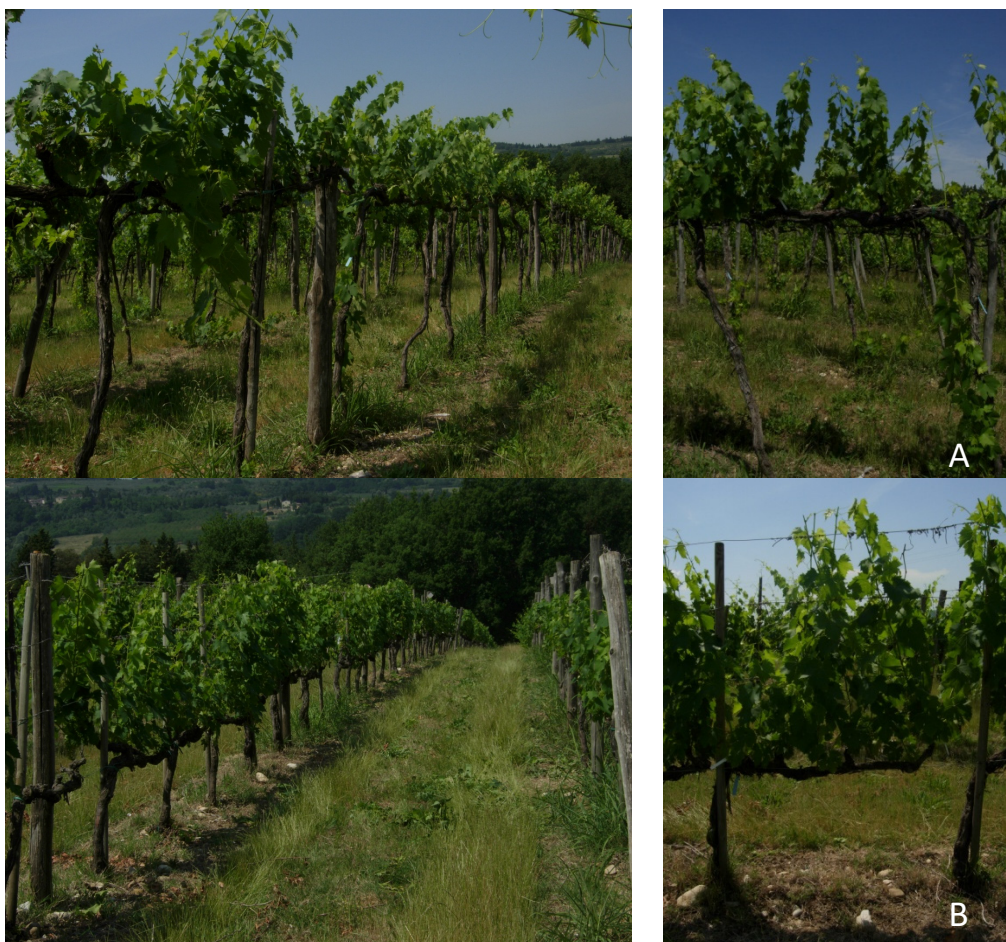

**Supplementary Figure S1.** Experimental site pictures. (A) SHW trellis, (B) VSP trellis.

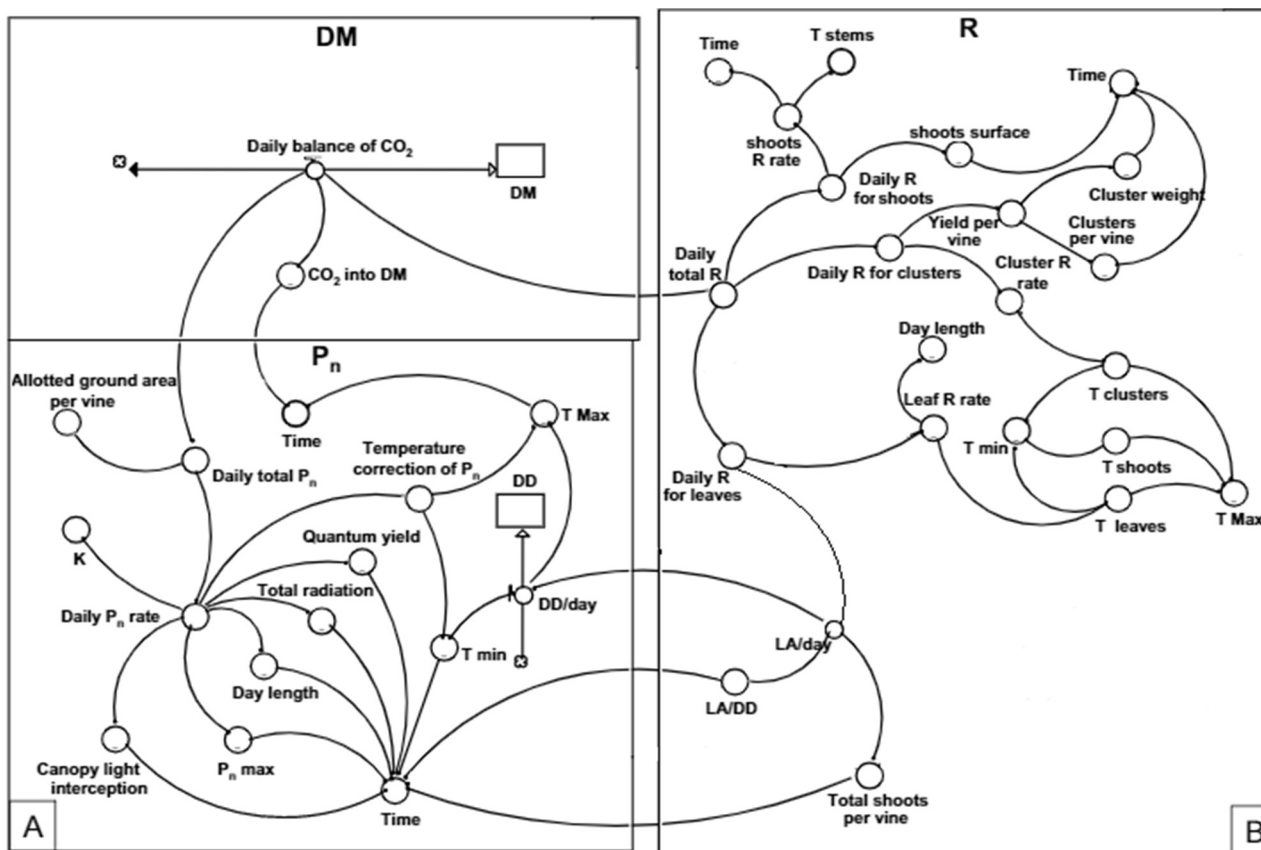

**Supplementary Figure S2.** Simplified model structure of STELLA software for prediction of the daily balance of CO<sub>2</sub> and dry matter (DM) in grapevine canopies (A) Photosynthesis sub-module (P<sub>n</sub>). (B) respiration sub-module (R). Abbreviations: maximum leaf photosynthesis (P<sub>n</sub> max); canopy light extinction coefficient (K); degree days (DD); minimum and maximum daily temperature (T min and T max); temperature (T); leaf area formed per DD (LA/DD). Figure modified by Poni et al. [28]. For other abbreviations, input description and details about building blocks refer also to STELLA software manual 7.0.3 (Isee Systems, N.H.).
